# Supplementary material for: Multiple global radiations in tadpole shrimps challenge the concept of ‘living fossils’
Source: PeerJ. 2013 Apr 2;1:e62. doi: 10.7717/peerj.62 (PMC3628881; doi:10.7717/peerj.62)
Supplement: Table S4 [file peerj-01-62-s006.docx]

| **Partition** | **Partition contents** | **Substitution model** |
| --- | --- | --- |
| 1 | 12S | GTR +G |
| 2 | 16S | GTR +G |
| 3 | 28S, Glyc. Synth. 1st position | GTR +G |
| 4 | COI 1st position | TrNef +G |
| 5 | COI 2nd position, EF1 2nd position, Glyc. Synth. 2nd position, RNA P. II 2nd position | GTR +G |
| 6 | COI 3rd position | TrN +G |
| 7 | EF1 1st position, RNA P. II 1st position | TrN +G |
| 8 | EF1 3rd position | GTR +G |
| 9 | Glyc. Synth. 3rd position, RNA P. II 3rd position | HKY +G |
